# Supplementary material
Source: MDPI journal article supplement (https://www.mdpi.com/2073-4395/12/11/2651)
Supplement: s1 [file s1]

## Supplementary material

**Table S1:** Weather data from sowing to end of data collection obtained from a climate station located between the two sites as reported by The National Climate Database from the National Institute of Water and Atmospheric Research (NIWA). Available online: <https://cliflo.niwa.co.nz/>

| Parameters               | Weeks after sowing |      |      |      |       |       |      |       |       |
|--------------------------|--------------------|------|------|------|-------|-------|------|-------|-------|
|                          | 1                  | 2    | 3    | 4    | 5     | 6     | 7    | 8     | 9     |
| Tmax (°C)                | 22.7               | 19.2 | 23.4 | 23.7 | 23.8  | 21.6  | 23.1 | 23.3  | 21.8  |
| Tmin (°C)                | 14.7               | 9.7  | 12.9 | 15.1 | 13.9  | 13.5  | 11.1 | 13.0  | 11.5  |
| Cumulative Rainfall (mm) | 34.6               | 39.2 | 68.8 | 71.4 | 121.2 | 124.8 | 125  | 127.2 | 149.2 |
| Relative humidity (%)    | 81.4               | 74.3 | 79.7 | 82.3 | 79.3  | 83.0  | 74.3 | 77.3  | 85.0  |

**Table S2:** Identification and quantification of compounds present (ng gDW<sup>-1</sup> h<sup>-1</sup>) in the headspace samples between the two sampled sites. Compounds with no value indicated were absent in the corresponding site.

| Class/ compound ID                            | Site 1  |         | Site 2  |         |
|-----------------------------------------------|---------|---------|---------|---------|
| <b>Green leaf volatiles (GLV)</b>             | MEAN    | SEM     | MEAN    | SEM     |
| 3-Hexen-1-ol, (Z)-                            | 0.892   | 0.424   | 3.707   | 2.411   |
| 3-Hexen-1-ol, acetate, (Z)-                   | 35.157  | 7.334   | 37.643  | 11.207  |
| <b>Total (GLV)</b>                            | 36.048  | 7.375   | 41.350  | 12.475  |
| <b>Monoterpenes (M)</b>                       |         |         |         |         |
| $\alpha$ -Pinene                              | 65.898  | 13.384  | 99.309  | 14.829  |
| $\beta$ -Pinene                               | 26.213  | 5.581   | 41.734  | 6.308   |
| $\beta$ -Myrcene                              | 450.047 | 118.694 | 466.232 | 98.038  |
| $\alpha$ -Phellandrene                        | 2.026   | 0.996   | 2.171   | 0.976   |
| 2-Carene                                      | 0.790   | 0.477   | 0.520   | 0.347   |
| 3-Carene                                      | 1.292   | 1.064   | 2.245   | 1.135   |
| Cyclopentene, 3-isopropenyl-5,5-dimethyl-     | 0.215   | 0.214   | 1.136   | 0.836   |
| Limonene                                      | 9.634   | 3.722   | 27.166  | 13.690  |
| Eucalyptol                                    | 0.216   | 0.153   | 1.687   | 1.012   |
| (E)- $\beta$ -Ocimene                         | 16.082  | 3.860   | 22.288  | 6.821   |
| (Z)- $\beta$ -Ocimene                         | 206.088 | 50.722  | 167.442 | 53.227  |
| $\gamma$ -Terpinene                           | 0.292   | 0.291   | 0.147   | 0.146   |
| Terpinolene                                   | 0.635   | 0.487   | 18.668  | 18.341  |
| Cyclohexene, 4-methyl-3-(1-methylethylidene)- | 60.244  | 26.858  | 72.702  | 28.039  |
| L-Camphor                                     | 0.354   | 0.175   | 0.399   | 0.295   |
| p-Cymenol                                     | 0.693   | 0.604   | 1.471   | 0.881   |
| Cyclohexene, 1-methyl-5-(1-methylethenyl)-    | 2.110   | 1.693   | 8.846   | 5.474   |
| L- $\beta$ -Pinene                            | 5.759   | 4.040   | 0.967   | 0.966   |
| Sabinene                                      | 2.918   | 1.840   | 6.030   | 3.543   |
| <b>Total M</b>                                | 851.507 | 182.974 | 941.160 | 180.094 |

**Sesquiterpenes/  
Sesquiterpenoids (S)**

|                                     |        |        |        |        |
|-------------------------------------|--------|--------|--------|--------|
| $\gamma$ -Caryophyllene             | 51.096 | 13.413 | 60.708 | 22.816 |
| $\alpha$ -Bergamotene               | 0.676  | 0.382  | 1.730  | 0.814  |
| ( <i>E</i> )- $\alpha$ -Bergamotene | 3.189  | 1.529  | 3.139  | 1.604  |
| $\alpha$ -Guaiene                   | 0.669  | 0.460  | 1.556  | 1.088  |
| ( <i>Z</i> )- $\beta$ -Farnesene    | 3.831  | 1.556  | 5.857  | 2.400  |
| ( <i>E</i> )- $\beta$ -Farnesene    | 2.019  | 1.487  | 1.311  | 0.746  |
| Humulene                            | 11.630 | 3.340  | 12.567 | 5.151  |
| $\beta$ -Selinene                   | 0.853  | 0.376  | 1.374  | 0.900  |
| $\alpha$ -Farnesene                 | 0.488  | 0.253  | -      | -      |
| Caryophyllene oxide                 | 0.487  | 0.177  | 1.052  | 0.774  |
| <b>Total S</b>                      | 74.940 | 16.922 | 89.295 | 32.320 |

**Other (O)**

|                 |        |       |       |       |
|-----------------|--------|-------|-------|-------|
| Dodecane        | 0.398  | 0.245 | 0.577 | 0.42  |
| Tridecane       | 0.261  | 0.111 | 0.760 | 0.430 |
| Dodecanoic acid | 4.409  | 1.601 | -     | -     |
| Butyric acid    | 0.535  | 0.382 | 1.038 | 0.917 |
| <b>Total O</b>  | 5.6022 | 1.603 | 2.377 | 1.054 |

**Table S3:** Flowering date (beginning of flowering) of the six hemp cultivars at both sites (Retrieved from unpublished (work in progress) doctoral dissertation, Massey University, New Zealand).

| Site | Cultivar   | Flowering start date<br>(days after sowing) |
|------|------------|---------------------------------------------|
| PGU  | CFX 2      | 27 days                                     |
|      | CRS1       | 27 days                                     |
|      | Ferimon 12 | 43 days                                     |
|      | Katani     | 25 days                                     |
|      | Futura75   | 45 days                                     |
|      | Finola     | 24 days                                     |
| PCRU | CFX 2      | 27 days                                     |
|      | CRS1       | 29 days                                     |
|      | Ferimon 12 | 39 days                                     |
|      | Katani     | 26 days                                     |
|      | Futura75   | 41 days                                     |
|      | Finola     | 24 days                                     |

**Table S4:** Field capacity measured in both sites from sowing to end of data collection (Retrieved from unpublished (work in progress) doctoral dissertation, Massey University, New Zealand).

| Field capacity                | Weeks after sowing |       |       |       |       |       |       |       |       |
|-------------------------------|--------------------|-------|-------|-------|-------|-------|-------|-------|-------|
|                               | 1                  | 2     | 3     | 4     | 5     | 6     | 7     | 8     | 9     |
| Field capacity at the PGU (%) | 50.70              | 69.00 | 61.87 | 50.69 | 73.13 | 72.06 | 66.79 | 66.44 | 83.57 |
| Field capacity the PCRU (%)   | 49.04              | 74.13 | 64.83 | 53.45 | 52.79 | 45.71 | 39.09 | 33.40 | 42.33 |

**Table S5:** Percentage contribution of different volatile compounds to the volatile blend of the six hemp cultivars ( $n = 80$ ). GLV = Green leaf volatiles, M = Monoterpene, S = Sesquiterpene/sesquiterpenoid, O = other, hyphen (-) = not detected.

| Compound Type                                     | CFX-2 |        | CRS-1 |        | Katani |        | Finola |        | Futura 75  | Ferimon 12 |
|---------------------------------------------------|-------|--------|-------|--------|--------|--------|--------|--------|------------|------------|
|                                                   | Male  | Female | Male  | Female | Male   | Female | Male   | Female | Monoecious | Monoecious |
| (Z)-3-Hexen-1-ol (GLV)                            | -     | <1     | 1     | -      | 1      | <1     | 1      | -      | 2          | <1         |
| (Z)-3-Hexen-1-ol acetate (GLV)                    | 6     | 7      | 9     | 8      | 5      | 4      | 7      | 3      | 37         | 4          |
| $\alpha$ -Pinene (M)                              | 18    | 19     | 19    | 12     | 9      | 8      | 17     | 5      | 16         | 6          |
| $\beta$ -Pinene (M)                               | 6     | 6      | 5     | 4      | 3      | 3      | 6      | 2      | 5          | 2          |
| $\beta$ -Myrcene (M)                              | 40    | 36     | 41    | 51     | 57     | 36     | 40     | 36     | 22         | 37         |
| $\alpha$ -Phellandrene (M)                        | -     | <1     | -     | <1     | -      | <1     | -      | <1     | -          | <1         |
| 2-Carene (M)                                      | -     | <1     | -     | -      | -      | <1     | -      | <1     | -          | <1         |
| 3-Carene (M)                                      | -     | <1     | -     | <1     | -      | <1     | -      | <1     | -          | <1         |
| Cyclopentene, 3-isopropenyl-5,5-dimethyl- (M)     | <1    | -      | -     | -      | -      | <1     | -      | -      | -          | -          |
| Limonene (M)                                      | 1     | 1      | 3     | 3      | 1      | 6      | 2      | <1     | 2          | 1          |
| Eucalyptol (M)                                    | <1    | -      | 1     | -      | -      | -      | -      | -      | 1          | <1         |
| (E)- $\beta$ -Ocimene (M)                         | 2     | 1      | 1     | 1      | 2      | 2      | 3      | 3      | -          | 2          |
| (Z)- $\beta$ -Ocimene (M)                         | 15    | 14     | 8     | 11     | 9      | 20     | 15     | 29     | 4          | 23         |
| $\gamma$ -Terpinene (M)                           | -     | -      | -     | -      | -      | <1     | -      | <1     | -          | -          |
| Terpinolene (M)                                   | <1    | <1     | -     | -      | -      | 2      | 1      | -      | -          | -          |
| Cyclohexene, 4-methyl-3-(1-methylethylidene)- (M) | -     | 4      | -     | 4      | 1      | 8      | <1     | 8      | -          | 15         |
| L-camphor (M)                                     | <1    | <1     | <1    | <1     | 1      | -      | -      | -      | 2          | <1         |
| p-cymenol (M)                                     | -     | <1     | -     | -      | -      | <1     | -      | <1     | -          | -          |
| Cyclohexene, 1-methyl-5-(1-methylethenyl)- (M)    | -     | 1      | <1    | <1     | 1      | -      | <1     | 1      | -          | <1         |
| L- $\beta$ -Pinene (M)                            | -     | <1     | -     | <1     | -      | <1     | -      | <1     | -          | -          |
| Sabinene (M)                                      | -     | <1     | -     | -      | -      | 1      | -      | <1     | -          | 2          |
| $\gamma$ -Caryophyllene (S)                       | 7     | 6      | 7     | 5      | 5      | 4      | 4      | 8      | 6          | 5          |
| $\alpha$ -Bergamotene (S)                         | <1    | <1     | -     | <1     | -      | <1     | <1     | <1     | -          | -          |
| (E)- $\alpha$ -Bergamotene (S)                    | -     | <1     | -     | <1     | -      | <1     | <1     | 1      | -          | <1         |
| $\alpha$ -Guaiene (S)                             | <1    | -      | -     | <1     | -      | <1     | -      | <1     | -          | -          |

|                                |        |         |        |         |        |         |        |         |      |        |
|--------------------------------|--------|---------|--------|---------|--------|---------|--------|---------|------|--------|
| (Z)- $\beta$ -Farnesene (S)    | <1     | <1      | -      | <1      | <1     | 1       | <1     | 1       | -    | <1     |
| (E)- $\beta$ -Farnesene (S)    | <1     | <1      | -      | <1      | -      | <1      | -      | <1      | -    | -      |
| Humulene (S)                   | 1      | 1       | 1      | 1       | 1      | 1       | <1     | 2       | 1    | 1      |
| $\beta$ -Selinene (S)          | <1     | <1      |        | <1      | -      | <1      | -      | <1      | -    | -      |
| $\alpha$ -Farnesene (S)        | -      | <1      | -      | -       | -      | -       | -      | <1      | -    | <1     |
| Caryophyllene oxide (S)        | <1     | <1      | -      | <1      | <1     | <1      | -      | <1      | -    | -      |
| Dodecane (O)                   | 1      | <1      | <1     | -       | <1     | -       | 1      | -       | <1   | -      |
| Tridecane (O)                  | 1      | <1      | 2      | -       | -      | -       | 1      | -       | <1   | <1     |
| Dodecanoic acid (O)            | -      | -       | 2      | <1      | 5      | <1      | 3      | <1      | 2    | -      |
| Butyric acid (O)               | -      | -       | <1     | <1      | -      | <1      | -      | -       | -    | -      |
| <b>Total Average Emissions</b> | 636.88 | 1205.84 | 389.87 | 1385.65 | 350.54 | 2268.35 | 464.43 | 2895.91 | 85.5 | 528.43 |

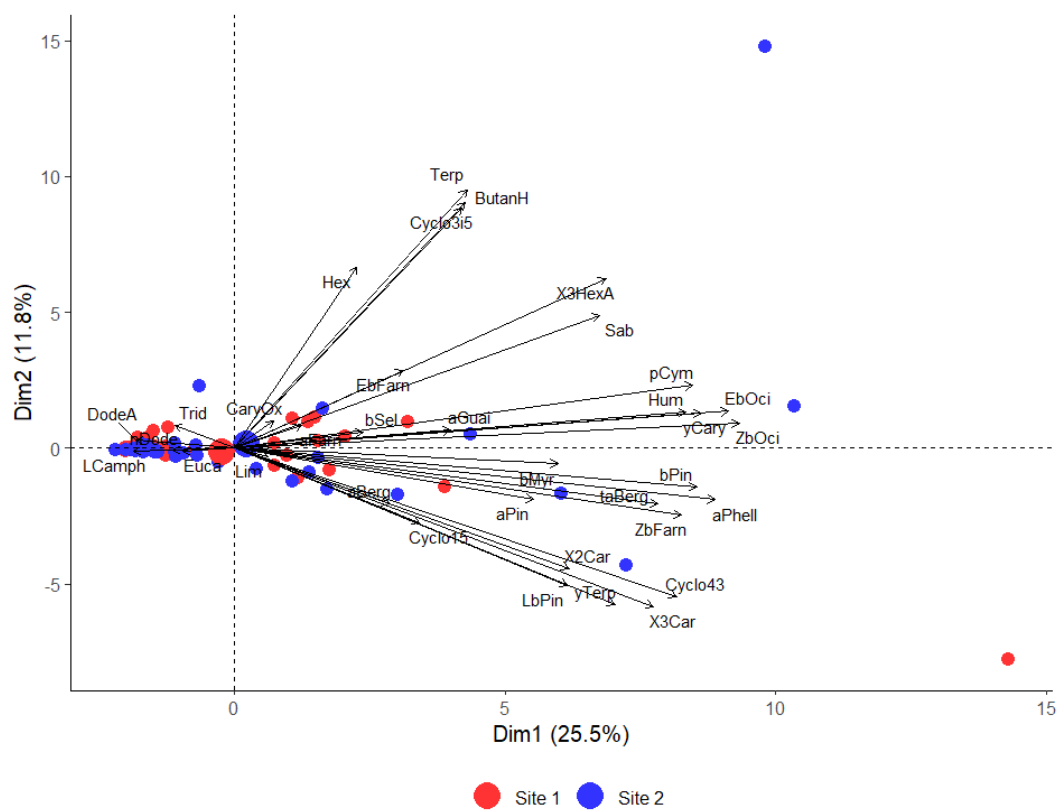

**Figure S1:** Principal component analysis (PCA) biplot showing scores of individual plants grown at two different sites. The PCA was based on the 35 compounds identified from hemp plants. Small circles correspond to individual samples and larger circles correspond to the treatment average.
